# Supplementary material for: Functional RNAi Screening Identifies G2/M and Kinetochore Components as Modulators of TNFα/NF-κB Prosurvival Signaling in Head and Neck Squamous Cell Carcinoma
Source: PubMed Central journal article supplement (PMC11541648; doi:10.1158/2767-9764.crc-24-0274), 2024-11-07
Supplement: crc-24-0274_figure_s1_suppsf1.pdf [file crc-24-0274_figure_s1_suppsf1.pdf]

## Supplementary Figures

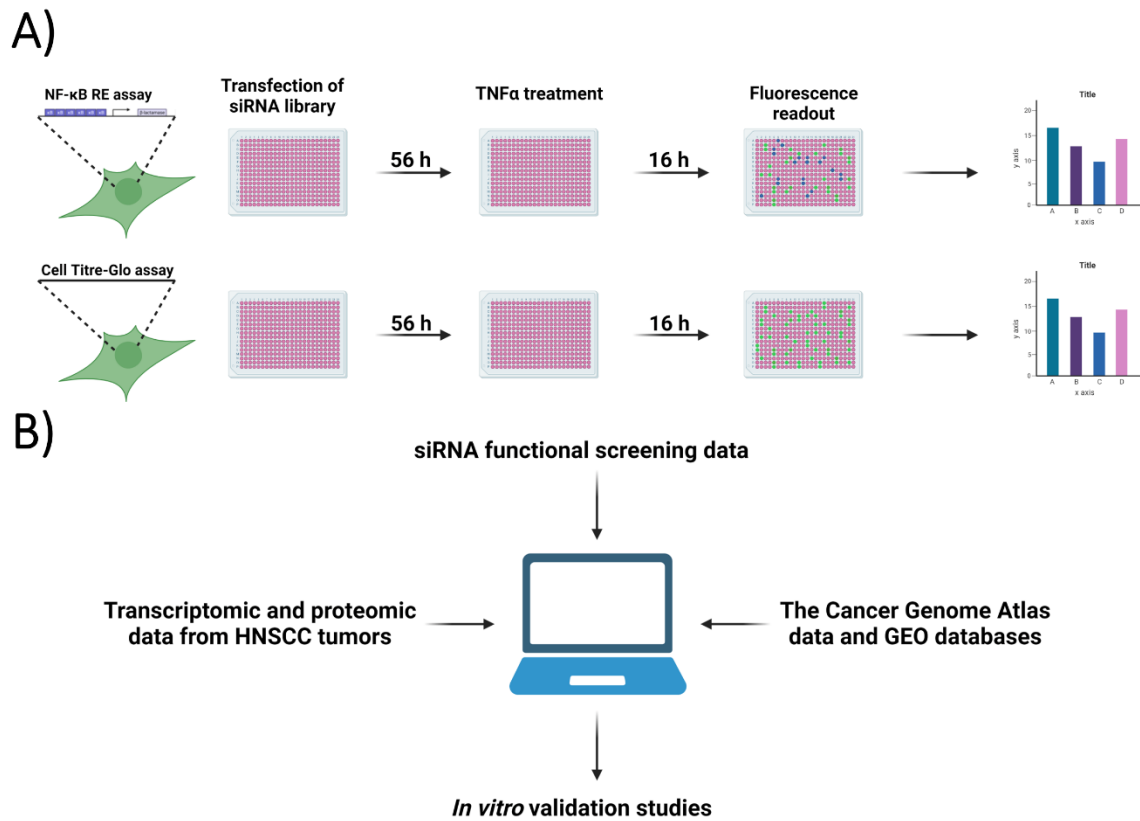

**Supplementary Figure 1. Schematic for RNAi screening platform and project pipeline.**

**A)** Schematic for the NF-κB reporter assay in UMSCC1<sup>κB</sup> cells and the subsequent RNAi screens for NF-κB activity and cell viability. **B)** Integrated approach used in the study.
