# Supplementary material for: Functional RNAi Screening Identifies G2/M and Kinetochore Components as Modulators of TNFα/NF-κB Prosurvival Signaling in Head and Neck Squamous Cell Carcinoma
Source: PubMed Central journal article supplement (PMC11541648; doi:10.1158/2767-9764.crc-24-0274), 2024-11-07
Supplement: crc-24-0274_figure_s2_suppsf2.pdf [file crc-24-0274_figure_s2_suppsf2.pdf]

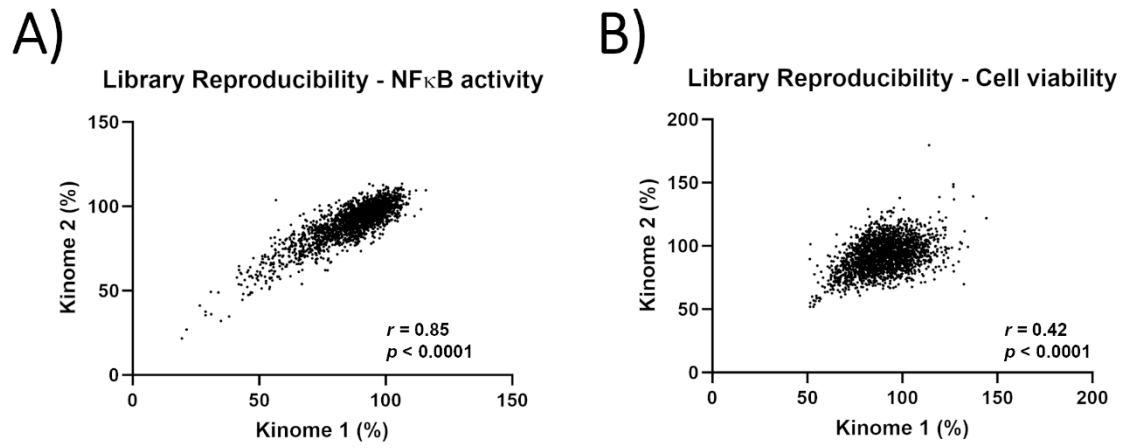

**Supplementary Figure 2. RNAi screens demonstrate high levels of reproducibility. A)** Correlation between Kinome 1 and Kinome 2 RNAi screen for NF- $\kappa$ B activity. **B)** Correlation between Kinome 1 and Kinome 2 RNAi screen for cell viability.
