# Supplementary material for: Functional RNAi Screening Identifies G2/M and Kinetochore Components as Modulators of TNFα/NF-κB Prosurvival Signaling in Head and Neck Squamous Cell Carcinoma
Source: PubMed Central journal article supplement (PMC11541648; doi:10.1158/2767-9764.crc-24-0274), 2024-11-07
Supplement: crc-24-0274_figure_s3_suppsf3.pdf [file crc-24-0274_figure_s3_suppsf3.pdf]

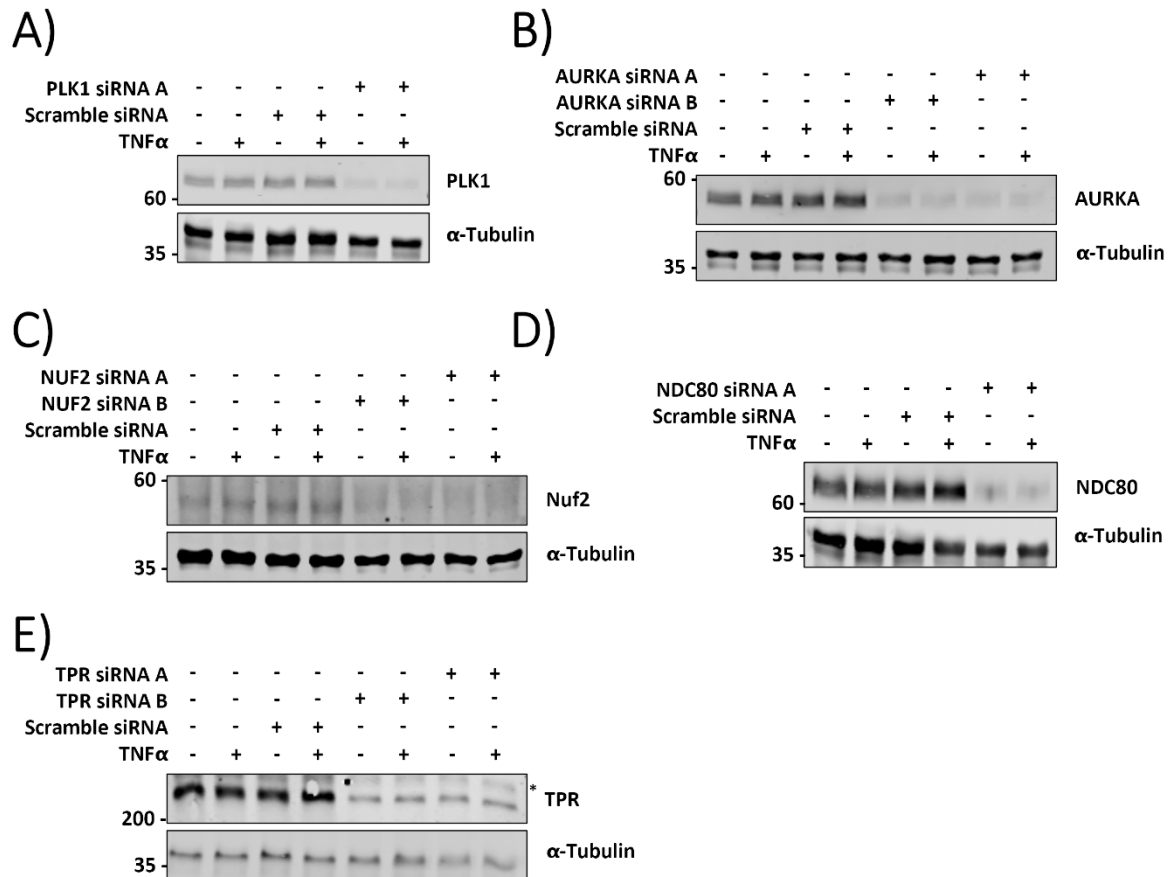

**Supplementary Figure 3. Depletion of G2/M kinases and kinetochore proteins in HNSCC cells.** **A)** Representative western blot of UMSCC1 cells after transfection with a specific PLK1 siRNA for 72 h and analysed for PLK1 expression.  $\alpha$ -tubulin was used as the loading control. **B)** Representative western blot of UMSCC1 cells after transfection with two specific AURKA siRNA for 72 h and analysed for AURKA expression  $\alpha$ -tubulin was used as the loading control. **C)** Representative western blot of UMSCC1 cells after transfection with two specific NUF2 siRNA for 72 h and analysed for NUF2 expression.  $\alpha$ -tubulin was used as the loading control. **D)** Representative western blot of UMSCC1 cells after transfection with a specific NDC80 siRNA for 72 h and analysed for NDC80 expression.  $\alpha$ -tubulin was used as the loading control. **E)** Representative western blot of UMSCC1 cells after transfection with two specific TPR siRNA for 72 h and analysed for TPR expression.  $\alpha$ -tubulin was used as the loading control.
