# Supplementary material for: Functional RNAi Screening Identifies G2/M and Kinetochore Components as Modulators of TNFα/NF-κB Prosurvival Signaling in Head and Neck Squamous Cell Carcinoma
Source: PubMed Central journal article supplement (PMC11541648; doi:10.1158/2767-9764.crc-24-0274), 2024-11-07
Supplement: crc-24-0274_figure_s4_suppsf4.pdf [file crc-24-0274_figure_s4_suppsf4.pdf]

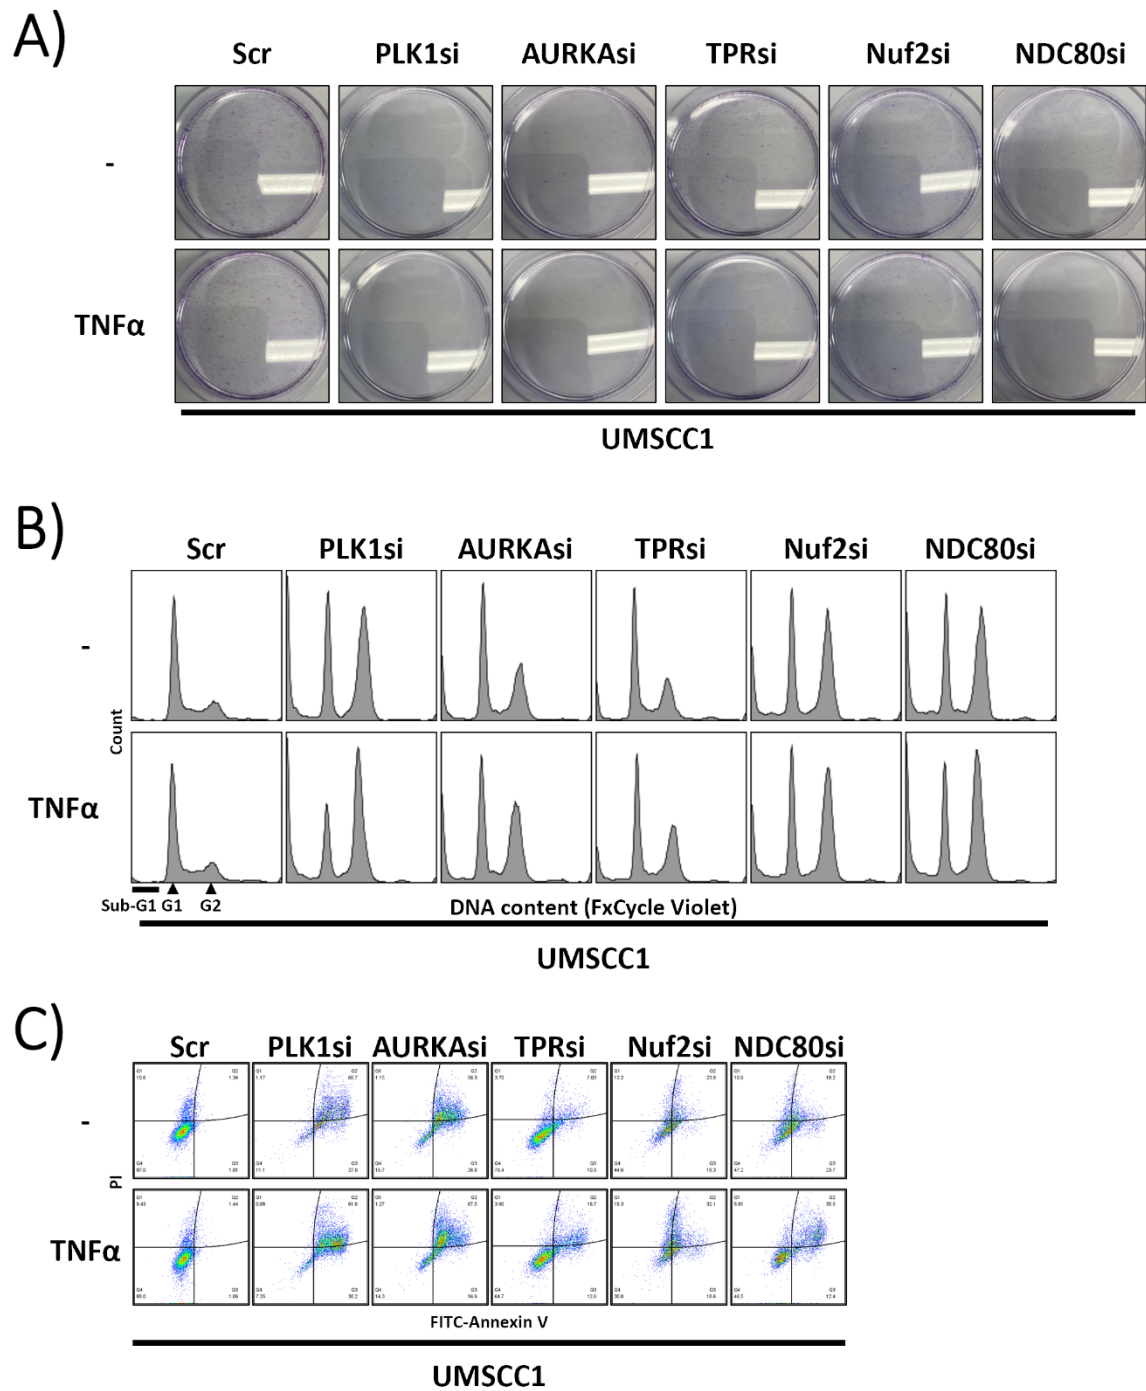

**Supplementary Figure 4. Representative images from Figure 3.** **A)** Representative images of colony formation assays in Figure 3C. **B)** Representative images of cell cycle analysis in Figure 3D. **C)** Representative images of Annexin V assay in Figure 3E.
