# Supplementary material for: Functional RNAi Screening Identifies G2/M and Kinetochore Components as Modulators of TNFα/NF-κB Prosurvival Signaling in Head and Neck Squamous Cell Carcinoma
Source: PubMed Central journal article supplement (PMC11541648; doi:10.1158/2767-9764.crc-24-0274), 2024-11-07
Supplement: crc-24-0274_figure_s5_suppsf5.pdf [file crc-24-0274_figure_s5_suppsf5.pdf]

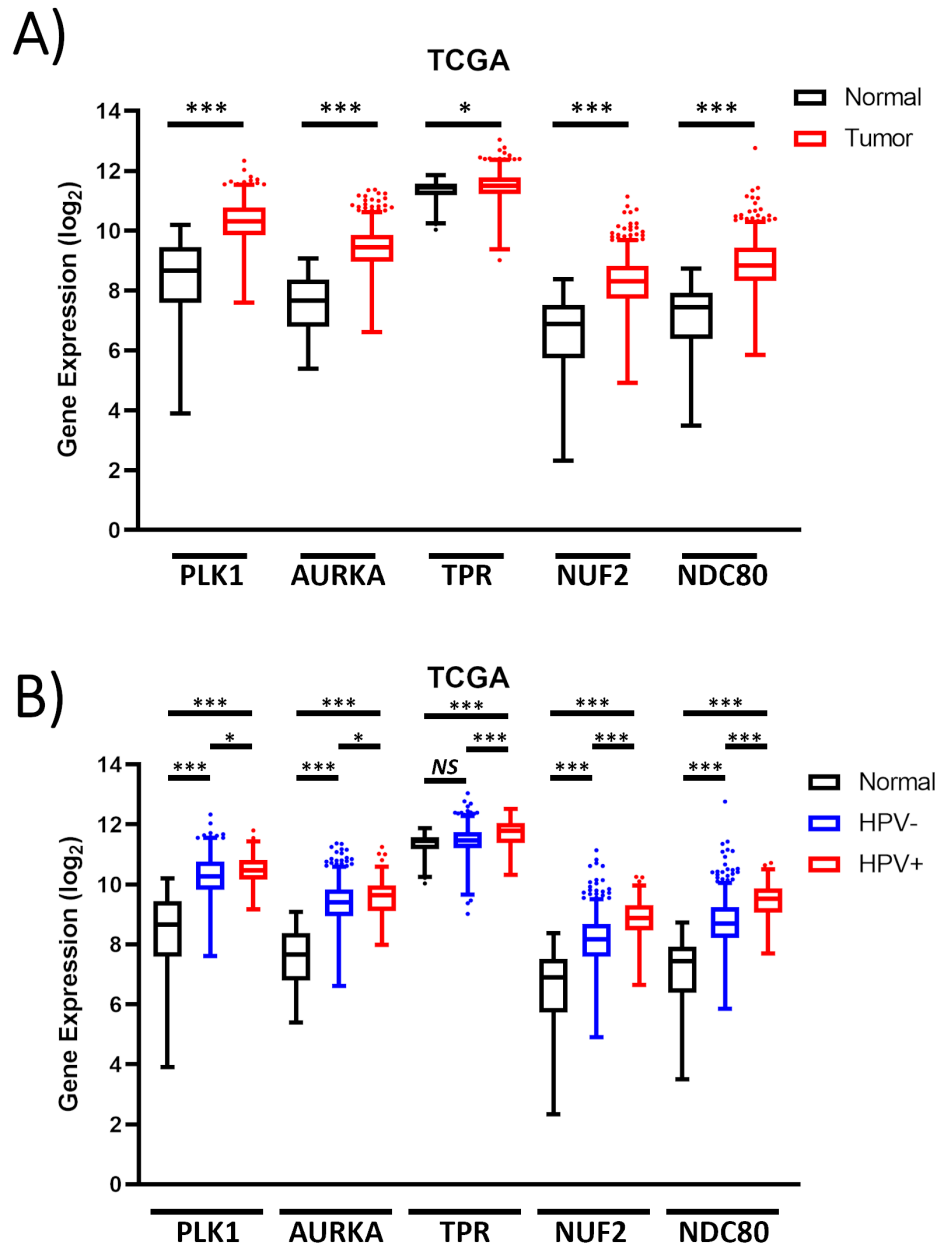

**Supplementary Figure 5. Expression of G2/M kinetochore components in TCGA HNSCC. A)** Box plot analysis of *PLK1*, *AURKA*, *TPR*, *NUF2* and *NDC80* mRNA expression in normal ( $n = 44$ ) and HNSCC ( $n = 516$ ) tissue from TCGA HNSCC database. **B)** Box plot analysis of *PLK1*, *AURKA*, *TPR*, *NUF2* and *NDC80* mRNA expression in normal ( $n = 44$ ), HPV- HNSCCs ( $n = 434$ ) and HPV+ HNSCCs ( $n = 80$ ) tissue from TCGA HNSCC database.
