# Supplementary material for: Functional RNAi Screening Identifies G2/M and Kinetochore Components as Modulators of TNFα/NF-κB Prosurvival Signaling in Head and Neck Squamous Cell Carcinoma
Source: PubMed Central journal article supplement (PMC11541648; doi:10.1158/2767-9764.crc-24-0274), 2024-11-07
Supplement: crc-24-0274_figure_s6_suppsf6.pdf [file crc-24-0274_figure_s6_suppsf6.pdf]

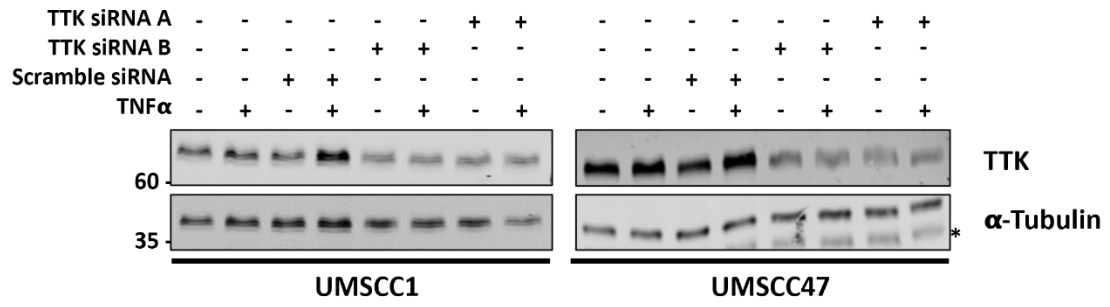

**Supplementary Figure 6. Depletion of TTK in HNSCC cells.** A) Representative western blot of UMSCC1 and UMSCC47 cells after transfection with two specific TTK siRNA for 72 h and analysed for TTK expression.  $\alpha$ -tubulin was used as the loading control.
